# Supplementary material for: Aeluropus littoralis stress-associated protein promotes water deficit resilience in engineered durum wheat
Source: PubMed Central journal article supplement — Heliyon. 2024 May 9;10(10):e30933. doi: 10.1016/j.heliyon.2024.e30933 (PMC11097078; doi:10.1016/j.heliyon.2024.e30933), 2024-05-09
Supplement: mmc1.pdf [file mmc1.pdf]

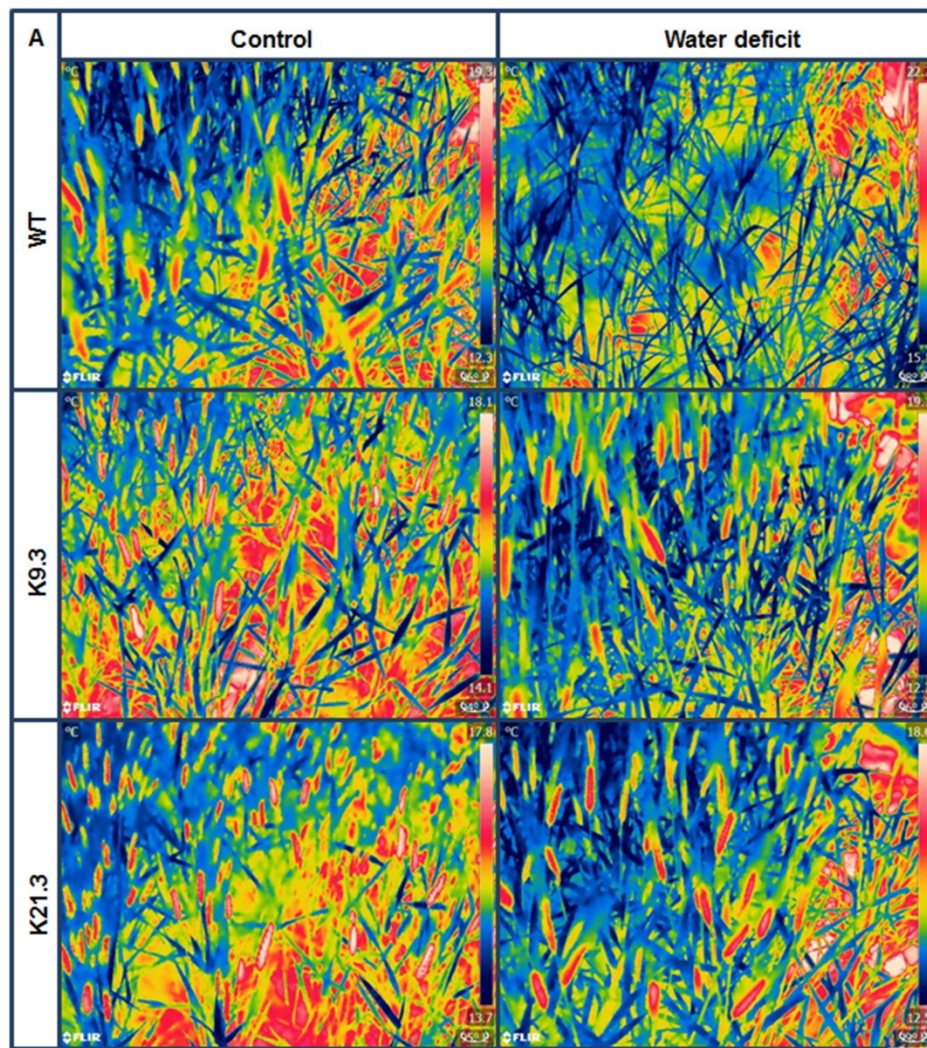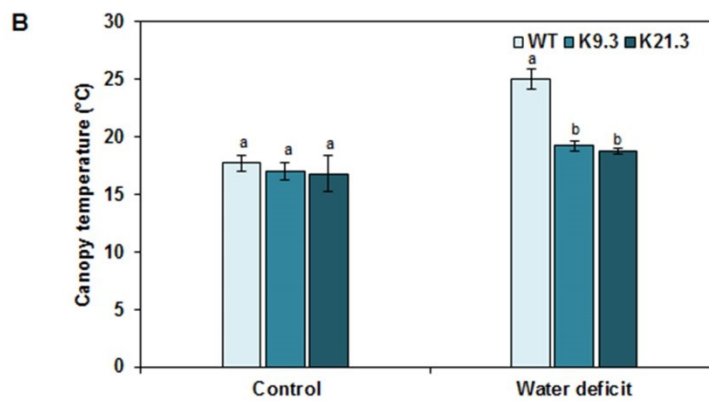

**Fig. S1** Thermal images of WT plants and *AISAP*-durum wheat lines. Bars represent the means  $\pm$  SE of three replicates. Letters above columns denote the significant differences compared with WT durum wheat plants at  $P \leq 0.05$  according to Duncan's multiple range test.
